# Supplementary material for: Down-regulation of microRNA-203-3p initiates type 2 pathology during schistosome infection via elevation of interleukin-33
Source: PubMed Central journal article supplement (PMC5875897; doi:10.1371/journal.ppat.1006957), 2018-03-19
Supplement: ppat.1006957.s009.pdf [file ppat.1006957.s009.pdf]

| gene    |                     | primer sequence (5'→3')                               |
|---------|---------------------|-------------------------------------------------------|
| miR-203 | RT stem-loop primer | GTCGTATCCAGTGCAGGGTCCGAGGTATTTCGCACTGGATACGACCTAGTGGT |
|         | forward primer      | ATGGTTCGTGGGGTGAAATGTTTAGGAC                          |
|         | reverse primer      | GCAGGGTCCGAGGTATTC                                    |
| U6      | forward primer      | GCTTCGGCAGCACATATACTAAAAT                             |
|         | reverse primer      | CGCTTCACGAATTTGCGTGTCA                                |
| TGF-β1  | forward primer      | TGACGTCCTGGAGTTGTACGG                                 |
|         | reverse primer      | GGTTCATGTCAATGGATGGTGC                                |
| Col 1α1 | forward primer      | GCACGAGTCA CACCGGAAC                                  |
|         | reverse primer      | CCAATGTCCAAGGGAGCCAC                                  |
| Col 3α1 | forward primer      | TGGTCTCAGGGTGAAAGG                                    |
|         | reverse primer      | GTCCAGCATCACCTTTTGGT                                  |
| α-SMA   | forward primer      | CGCTGCTCCAGCTATGTGTGA                                 |
|         | reverse primer      | TTTGGCCCATCCAACCATTAC                                 |
| IL-13   | forward primer      | GGAGCTGAGCAACATCACACA                                 |
|         | reverse primer      | GGTCTGTAGATGGCATTGCA                                  |
| IL-4    | forward primer      | GGTCTCAACCCCGACTAGT                                   |
|         | reverse primer      | GCCGATGATCTCTCAAGTGAT                                 |
| IL-10   | forward primer      | GCTCTTACTGACTGGCATGAG                                 |
|         | reverse primer      | CGCAGCTCTAGGAGCATGTG                                  |
| IL-5    | forward primer      | GCAATGAGACGATGAGGCTTC                                 |
|         | reverse primer      | GCCCCTGAAAGATTTCTCCAATG                               |
| IFN-γ   | forward primer      | ATGAACGCTACACTGCATC                                   |
|         | reverse primer      | CCATCCTTTTGCCAGTTCCTC                                 |
| TNF-α   | forward primer      | ATCCGCGACGTGGAAGT                                     |
|         | reverse primer      | ACCGCCTGGAGTTCTGGAA                                   |
| IL-33   | forward primer      | ATTTCCCGCAAAGTTCAG                                    |
|         | reverse primer      | AACGGAGTCTCATGCAGTAGA                                 |
| GAPDH   | forward primer      | ACCACAGTCCATGCCATCAC                                  |
|         | reverse primer      | TCCACCACCCTGTTGCTGTA                                  |
